# Supplementary material for: Solvent-mediated crystal-to-crystal transformations from a cationic homometallic metal–organic framework to heterometallic frameworks
Source: Royal Society of Chemistry journal article supplement (doi:10.1039/c4ce01035c), 2014-01-01
Supplement: c4ce01035c1.pdf [file c4ce01035c1.pdf]

## *Supporting Informations*

### **Solvent-mediated crystal-to-crystal transformations from a cationic homometallic metal-organic framework to heterometallic frameworks**

Xinxiong Li, Yaqiong Gong, Huaixia Zhao, Ruihu Wang\*

State Key Laboratory of Structural Chemistry, Fujian Institute of Research on the Structure of Matter, Chinese Academy of Sciences, Fuzhou, Fujian, 350002, China

#### **Content**

**Table S1** Selected Bond Lengths (Å) and Bond Angles (°) for Complex **1**.

**Table S2** Selected Bond Lengths (Å) and Bond Angles (°) for Complex **2**.

**Figure S1** Simulate and experimental PXRD patterns of **1**.

**Figure S2** Simulate and experimental PXRD patterns of **2**.

**Figure S3** Oscilloscope traces of SHG signals of **1**.

**Table S1** Selected Bond Lengths (Å) and Bond Angles (°) for Complex **1**.

|                      |            |                     |            |
|----------------------|------------|---------------------|------------|
| Ag(1)-N(12)          | 2.187(3)   | Cr(1)-O(6)          | 1.609(2)   |
| Ag(1)-N(2)#1         | 2.214(3)   | Cr(1)-O(7)          | 1.622(3)   |
| Ag(1)-N(8)#2         | 2.445(3)   | Cr(1)-O(2)          | 1.792(3)   |
| Ag(1)-Ag(2)#3        | 3.1396(7)  | Cr(2)-O(3)          | 1.600(3)   |
| Ag(2)-N(7)#2         | 2.207(3)   | Cr(2)-O(4)          | 1.616(2)   |
| Ag(2)-N(5)           | 2.235(3)   | Cr(2)-O(1)          | 1.619(3)   |
| Ag(2)-N(11)          | 2.418(3)   | Cr(2)-O(2)          | 1.785(3)   |
| Ag(2)-O(1)           | 2.555(3)   | Cr(1)-O(5)          | 1.609(3)   |
| N(12)-Ag(1)-N(2)#1   | 158.28(10) | N(11)-Ag(2)-Ag(1)#4 | 108.91(7)  |
| N(12)-Ag(1)-N(8)#2   | 105.58(10) | O(1)-Ag(2)-Ag(1)#4  | 130.75(7)  |
| N(2)#1-Ag(1)-N(8)#2  | 96.10(10)  | O(5)-Cr(1)-O(6)     | 109.08(14) |
| N(12)-Ag(1)-Ag(2)#3  | 83.47(8)   | O(5)-Cr(1)-O(7)     | 109.04(14) |
| N(2)#1-Ag(1)-Ag(2)#3 | 81.75(8)   | O(6)-Cr(1)-O(7)     | 110.53(14) |
| N(8)#2-Ag(1)-Ag(2)#3 | 136.00(7)  | O(5)-Cr(1)-O(2)     | 107.70(13) |
| N(7)#2-Ag(2)-N(5)    | 157.79(10) | O(6)-Cr(1)-O(2)     | 108.64(13) |
| N(7)#2-Ag(2)-N(11)   | 108.43(9)  | O(7)-Cr(1)-O(2)     | 111.77(15) |
| N(5)-Ag(2)-N(11)     | 93.14(10)  | O(3)-Cr(2)-O(4)     | 109.09(16) |
| N(7)#2-Ag(2)-O(1)    | 92.81(10)  | O(3)-Cr(2)-O(1)     | 110.03(17) |
| N(5)-Ag(2)-O(1)      | 82.92(10)  | O(4)-Cr(2)-O(1)     | 109.47(15) |
| N(11)-Ag(2)-O(1)     | 113.77(9)  | O(3)-Cr(2)-O(2)     | 107.86(15) |
| N(7)#2-Ag(2)-Ag(1)#4 | 96.13(7)   | O(4)-Cr(2)-O(2)     | 110.18(13) |
| N(5)-Ag(2)-Ag(1)#4   | 71.16(7)   | O(1)-Cr(2)-O(2)     | 110.18(16) |

Symmetry transformations used to generate equivalent atoms: #1  $x-1/4, -y+1/4, z-5/4$ ; #2  $-x+3/4, y+1/4, z-1/4$ ; #3  $x-1/4, -y+1/4, z-1/4$ ; #4  $x+1/4, -y+1/4, z+1/4$ .

**Table S2** Selected Bond Lengths (Å) and Bond Angles (°) for Complex 2.

|                       |            |                    |            |
|-----------------------|------------|--------------------|------------|
| Ag(1)-N(13)           | 2.255(3)   | Cr(1)-O(4)         | 1.618(4)   |
| Ag(1)-N(7)            | 2.258(3)   | Cr(1)-O(12)        | 1.620(4)   |
| Ag(1)-N(2)#1          | 2.469(4)   | Cr(1)-O(5)         | 1.790(4)   |
| Ag(1)-O(8)            | 2.599(4)   | Cr(2)-O(13)        | 1.597(4)   |
| Ag(2)-N(17)#2         | 2.196(3)   | Cr(2)-O(11)        | 1.608(3)   |
| Ag(2)-N(17)#3         | 2.196(3)   | Cr(2)-O(3)         | 1.614(4)   |
| Ag(2)-O(12)#4         | 2.590(4)   | Cr(2)-O(5)         | 1.783(4)   |
| Ag(2)-O(12)           | 2.590(4)   | Cr(3)-O(9)         | 1.612(4)   |
| Ag(3)-N(6)            | 2.178(3)   | Cr(3)-O(8)         | 1.618(4)   |
| Ag(3)-N(10)           | 2.190(3)   | Cr(3)-O(6)         | 1.621(4)   |
| Ag(3)-Ag(5)           | 3.3558(6)  | Cr(3)-O(14)        | 1.825(3)   |
| Ag(4)-N(12)           | 2.248(3)   | Cr(4)-O(1)         | 1.582(5)   |
| Ag(4)-N(8)            | 2.256(3)   | Cr(4)-O(2)         | 1.583(5)   |
| Ag(4)-N(18)#5         | 2.534(4)   | Cr(4)-O(10)        | 1.618(3)   |
| Ag(4)-O(10)           | 2.566(3)   | Cr(4)-O(14)        | 1.799(3)   |
| Ag(5)-N(15)#6         | 2.189(4)   | Cr(1)-O(7)         | 1.600(4)   |
| Ag(5)-O(14)           | 2.271(3)   | Ag(5)-O(3)         | 2.481(4)   |
| Ag(5)-O(6)#3          | 2.474(4)   |                    |            |
| N(13)-Ag(1)-N(7)      | 162.26(14) | O(14)-Ag(5)-Ag(3)  | 78.75(9)   |
| N(13)-Ag(1)-N(2)#1    | 93.27(13)  | O(6)#3-Ag(5)-Ag(3) | 143.56(9)  |
| N(7)-Ag(1)-N(2)#1     | 92.26(13)  | O(3)-Ag(5)-Ag(3)   | 132.74(10) |
| N(13)-Ag(1)-O(8)      | 111.17(14) | O(7)-Cr(1)-O(4)    | 110.7(2)   |
| N(7)-Ag(1)-O(8)       | 86.17(14)  | O(7)-Cr(1)-O(12)   | 109.5(2)   |
| N(2)#1-Ag(1)-O(8)     | 84.00(13)  | O(4)-Cr(1)-O(12)   | 110.8(2)   |
| N(17)#2-Ag(2)-N(17)#3 | 179.998(2) | O(7)-Cr(1)-O(5)    | 108.1(2)   |
| N(17)#2-Ag(2)-O(12)#4 | 86.84(14)  | O(4)-Cr(1)-O(5)    | 107.9(2)   |
| N(17)#3-Ag(2)-O(12)#4 | 93.16(14)  | O(12)-Cr(1)-O(5)   | 109.8(2)   |
| N(17)#2-Ag(2)-O(12)   | 93.16(14)  | O(13)-Cr(2)-O(11)  | 109.8(2)   |
| N(17)#3-Ag(2)-O(12)   | 86.84(14)  | O(13)-Cr(2)-O(3)   | 111.1(2)   |
| O(12)#4-Ag(2)-O(12)   | 180.00(19) | O(11)-Cr(2)-O(3)   | 110.3(2)   |

|                      |            |                   |            |
|----------------------|------------|-------------------|------------|
| N(6)-Ag(3)-N(10)     | 172.29(14) | O(13)-Cr(2)-O(5)  | 107.7(2)   |
| N(6)-Ag(3)-Ag(5)     | 112.89(10) | O(11)-Cr(2)-O(5)  | 109.24(19) |
| N(10)-Ag(3)-Ag(5)    | 74.18(10)  | O(3)-Cr(2)-O(5)   | 108.7(2)   |
| N(12)-Ag(4)-N(8)     | 162.68(13) | O(9)-Cr(3)-O(8)   | 109.6(2)   |
| N(12)-Ag(4)-N(18)#5  | 94.99(13)  | O(9)-Cr(3)-O(6)   | 111.7(2)   |
| N(8)-Ag(4)-N(18)#5   | 94.07(13)  | O(8)-Cr(3)-O(6)   | 112.0(2)   |
| N(12)-Ag(4)-O(10)    | 83.58(12)  | O(9)-Cr(3)-O(14)  | 107.13(18) |
| N(8)-Ag(4)-O(10)     | 90.35(13)  | O(8)-Cr(3)-O(14)  | 108.42(18) |
| N(18)#5-Ag(4)-O(10)  | 168.56(12) | O(6)-Cr(3)-O(14)  | 107.78(18) |
| N(15)#6-Ag(5)-O(14)  | 148.55(14) | O(1)-Cr(4)-O(2)   | 109.5(4)   |
| N(15)#6-Ag(5)-O(6)#3 | 112.89(14) | O(1)-Cr(4)-O(10)  | 112.4(3)   |
| O(14)-Ag(5)-O(6)#3   | 88.07(13)  | O(2)-Cr(4)-O(10)  | 111.0(3)   |
| N(15)#6-Ag(5)-O(3)   | 110.41(15) | O(1)-Cr(4)-O(14)  | 106.7(2)   |
| O(14)-Ag(5)-O(3)     | 95.08(13)  | O(2)-Cr(4)-O(14)  | 108.7(3)   |
| O(6)#3-Ag(5)-O(3)    | 81.77(14)  | O(10)-Cr(4)-O(14) | 108.39(17) |

Symmetry transformations used to generate equivalent atoms: #1  $x, y-1, z$ ; #2  $x-1, y, z-1$ ; #3  $-x+4, -y+3, -z+3$ ; #4  $-x+3, -y+3, -z+2$ ; #5  $x, y, z-1$ ; #6  $x, y+1, z+1$ .

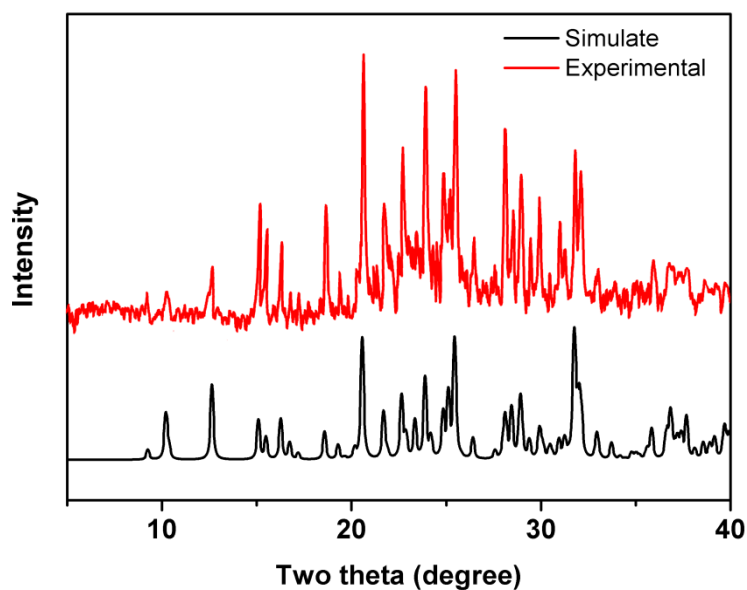

**Figure S1** Simulate and experimental PXRD patterns of **1**.

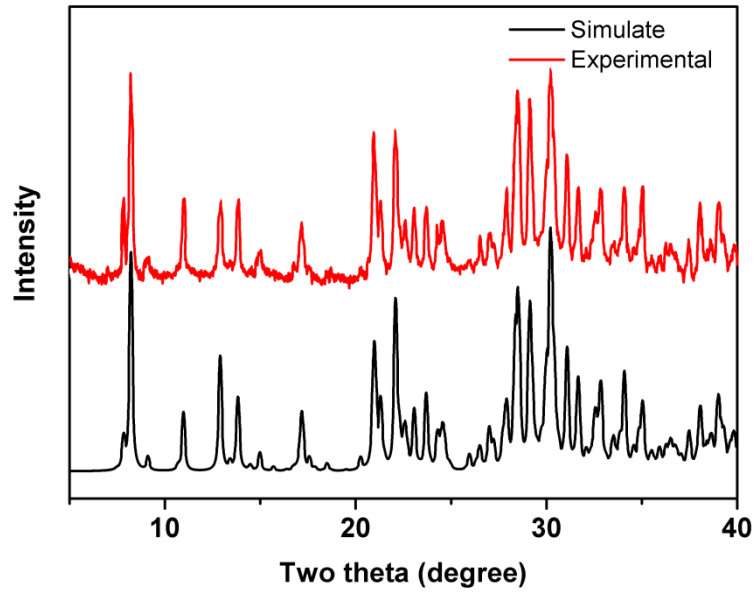

**Figure S2** Simulate and experimental PXRD patterns of **2**.

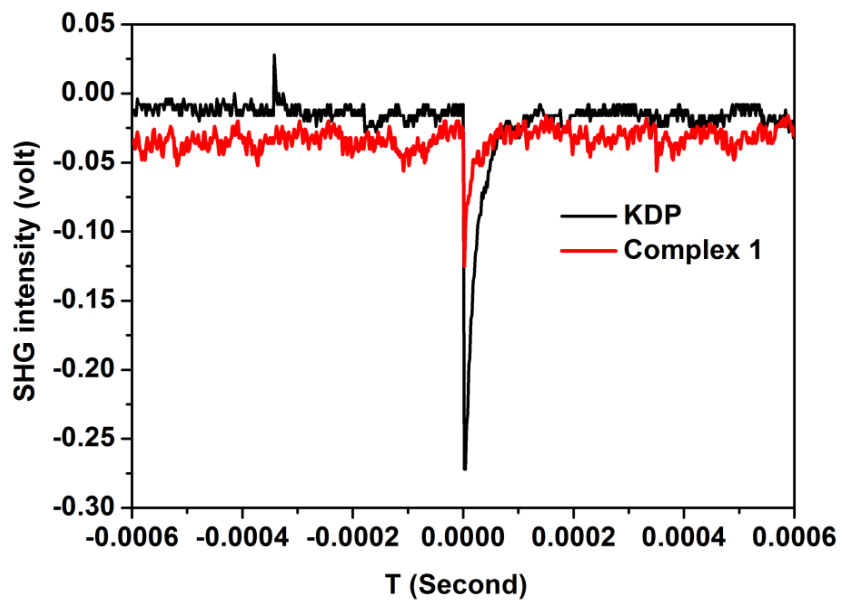

**Figure S3** Oscilloscope traces of SHG signals of **1**.
